# Supplementary material for: Dispersion of TiO2 nanoparticles improves burn wound healing and tissue regeneration through specific interaction with blood serum proteins
Source: PubMed Central journal article supplement (PMC5684224; doi:10.1038/s41598-017-15792-w), 2017-11-13
Supplement: 41598_2017_15792_MOESM1_ESM.pdf [file 41598_2017_15792_MOESM1_ESM.pdf]

## **Supplementary materials**

# **Dispersion of TiO<sub>2</sub> nanoparticles improves burn wound healing and tissue regeneration through specific interaction with blood serum proteins**

Gulaim A. Seisenbaeva,<sup>1</sup> Karin Fromell,<sup>2</sup> Vasiliy V. Vinogradov,<sup>3</sup> Aleksey N. Terekhov,<sup>4</sup>  
Andrey V. Pakhomov,<sup>4</sup> Bo Nilsson,<sup>2</sup> Kristina Nilsson Ekdahl,<sup>2,5</sup> Vladimir V. Vinogradov,<sup>3</sup>  
Vadim G. Kessler,<sup>1\*</sup>

1 Department of Chemistry and Biotechnology, BioCenter, Swedish University of Agricultural Sciences, Box 7015, SE-750 07 Uppsala, Sweden,

2 Department of Immunology, Genetics and Pathology, Rudbeck Laboratory C5:3, Uppsala University, SE-751 85 Uppsala, Sweden,

3 Laboratory of Solution Chemistry of Advanced Materials and Technologies, ITMO University, St. Petersburg, 197101, Russian Federation,

4 Ivanovo State Medical Academy, Ivanovo, 153012, Russian Federation

5 Linnæus Centre for Biomaterials Chemistry, Linnæus University, SE-391 82 Kalmar, Sweden,

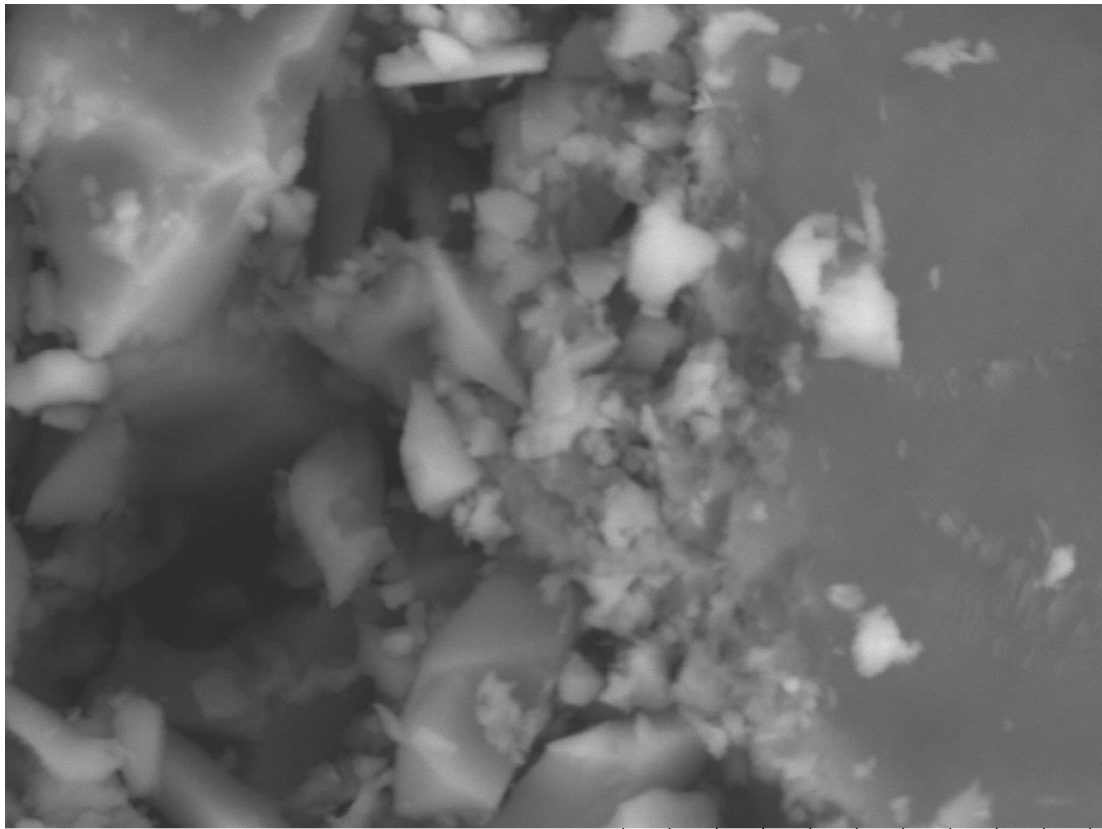

TM-1000\_0099

2008-04-25 11:12

10 um

Figure FS1. SEM view of the vacuum dried original TiO<sub>2</sub> sol diluted by isotonic NaCl solution 1:1 by volume.

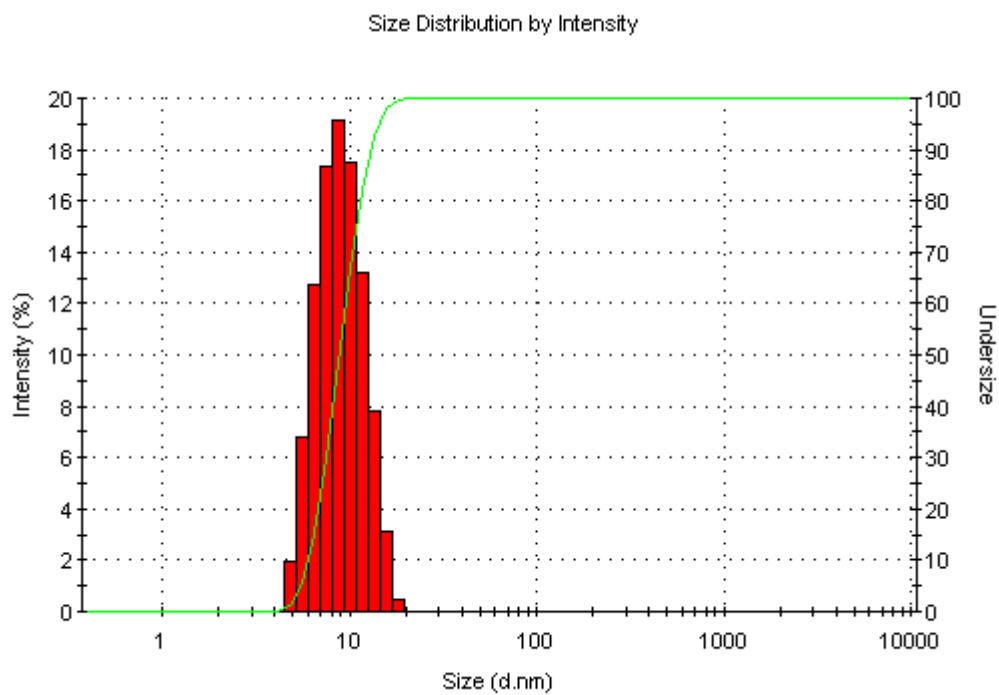

Figure FS2 Size distribution of the TiO<sub>2</sub> nanoparticles in the sol diluted by isotonic NaCl solution 1:1 by volume.

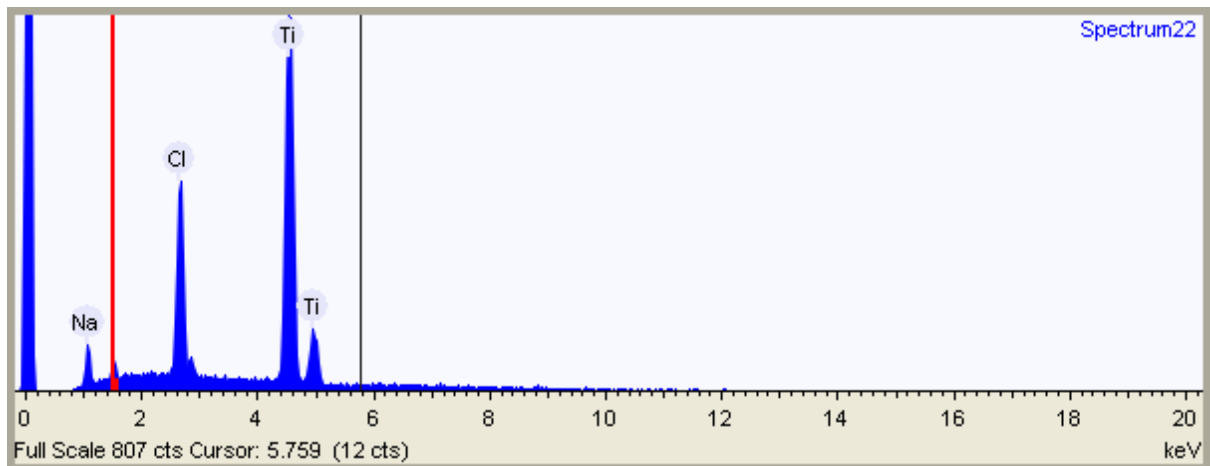

Figure FS3. EDS spectrum of the vacuum dried original TiO<sub>2</sub> sol diluted by isotonic NaCl solution 1:1 by volume.

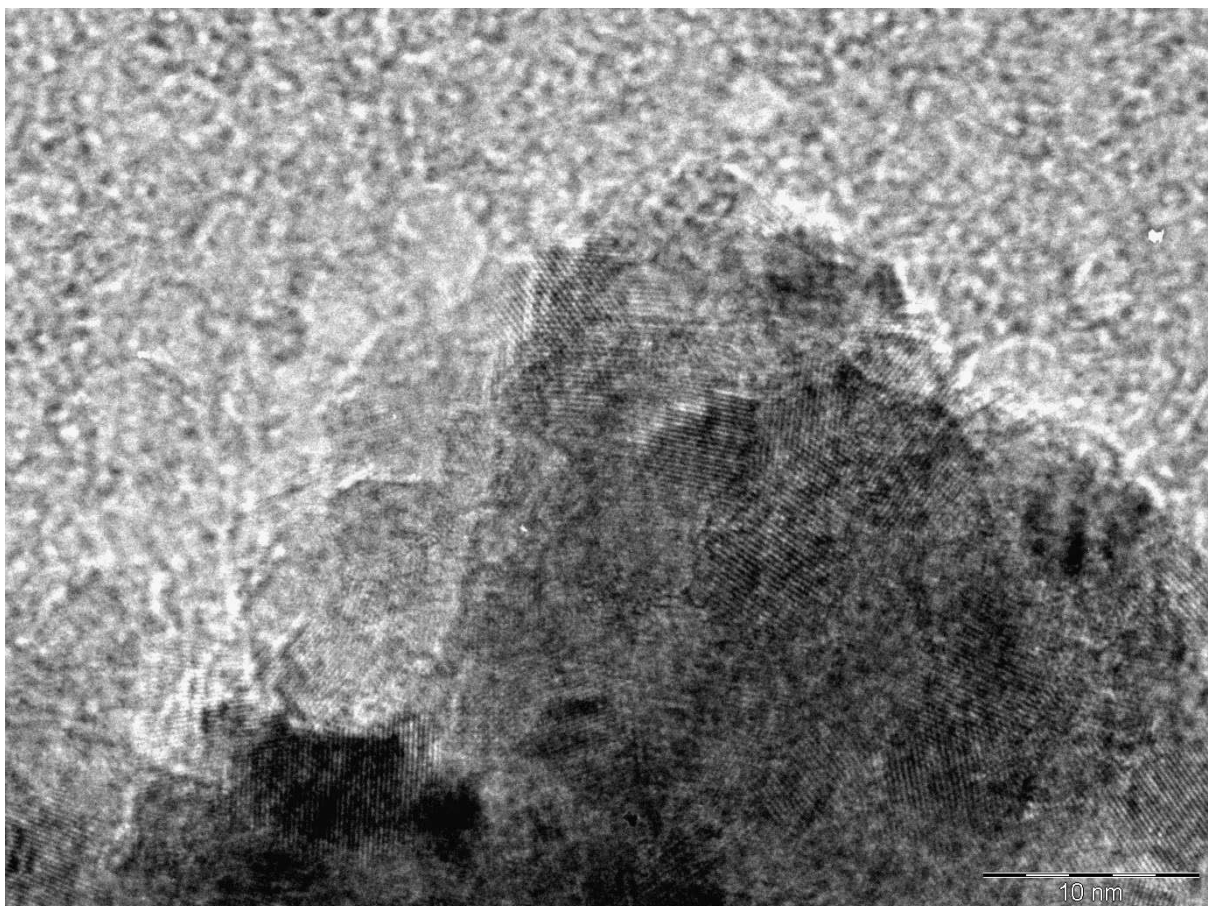

Figure FS4. TEM view of the TiO<sub>2</sub> nanoparticles in an air-dried droplet of the sol.

Table TS1 Results of EDS analysis with normalized content of all identified elements

**TiO<sub>2</sub> coating on a blood clot**

| Element   | Weight % |
|-----------|----------|
| Chlorine  | 0.9      |
| Potassium | 1.0      |
| Titanium  | 98.1     |

**Inner part of the TiO<sub>2</sub> coated blood clot**

| Element    | Weight % |
|------------|----------|
| Sodium     | 1.9      |
| Magnesium  | 6.1      |
| Phosphorus | 13.3     |
| Sulfur     | 44.7     |
| Potassium  | 20.6     |
| Calcium    | 2.2      |
| Titanium   | 2.5      |
| Iron       | 8.6      |

Table TS2 Wound size development in the % of the initial size.

Group 1

| Day | Animal 1 | Animal 2 | Animal 3 |
|-----|----------|----------|----------|
| 1   | 100      | 100      | 100      |
| 2   | 95       | 81       | 87       |
| 3   | 82       | 73       | 79       |
| 4   | 60       | 55       | 51       |
| 7   | 45       | 37       | 37       |
| 8   | 31       | 25       | 25       |
| 9   | 23       | 20       | 22       |
| 10  | 18       | 18       | 14       |
| 11  | 10       | 10       | 10       |
| 12  | 5        | 7        | 7        |
| 14  | 1        | 3        | 4        |
| 15  | 1        | 1        | 2        |
| 16  | 0        | 0        | 0        |
| 17  | 0        | 0        | 0        |
| 18  | 0        | 0        | 0        |
| 19  | 0        | 0        | 0        |

Group 2

| Day | Animal 4 | Animal 5 | Animal 6 |
|-----|----------|----------|----------|
| 1   | 100      | 100      | 100      |
| 2   | 85       | 77       | 80       |
| 3   | 66       | 60       | 63       |
| 4   | 59       | 52       | 55       |
| 7   | 30       | 30       | 33       |
| 8   | 23       | 29       | 21       |
| 9   | 18       | 19       | 20       |
| 10  | 16       | 13       | 10       |
| 11  | 7        | 10       | 9        |
| 12  | 2        | 5        | 7        |
| 14  | 0        | 2        | 4        |
| 15  | 0        | 0        | 1        |
| 16  | 0        | 0        | 0        |
| 17  | 0        | 0        | 0        |
| 18  | 0        | 0        | 0        |
| 19  | 0        | 0        | 0        |

### Group 3

| Day | Animal 7 | Animal 8 | Animal 9 |
|-----|----------|----------|----------|
| 1   | 100      | 100      | 100      |
| 2   | 99       | 95       | 99       |
| 3   | 89       | 82       | 88       |
| 4   | 86       | 80       | 70       |
| 7   | 77       | 75       | 65       |
| 8   | 55       | 39       | 40       |
| 9   | 36       | 32       | 34       |
| 10  | 27       | 20       | 24       |
| 11  | 15       | 12       | 18       |
| 12  | 11       | 9        | 10       |
| 14  | 6        | 2        | 3        |
| 15  | 3        | 1        | 1        |
| 16  | 1        | 0        | 0        |
| 17  | 0,5      | 0        | 0        |
| 18  | 0        | 0        | 0        |
| 19  | 0        | 0        | 0        |

### Group 4

| day | Animal 10 | Animal 11 | Animal 12 |
|-----|-----------|-----------|-----------|
| 1   | 100       | 100       | 100       |
| 2   | 95        | 89        | 92        |
| 3   | 85        | 79        | 75        |
| 4   | 70        | 61        | 63        |
| 7   | 55        | 41        | 54        |
| 8   | 40        | 31        | 37        |
| 9   | 23        | 22        | 30        |
| 10  | 20        | 9         | 19        |
| 11  | 12        | 6         | 14        |
| 12  | 5         | 2         | 11        |
| 14  | 1         | 1         | 6         |
| 15  | 0,5       | 0         | 2         |
| 16  | 0         | 0         | 0         |
| 17  | 0         | 0         | 0         |
| 18  | 0         | 0         | 0         |
| 19  | 0         | 0         | 0         |

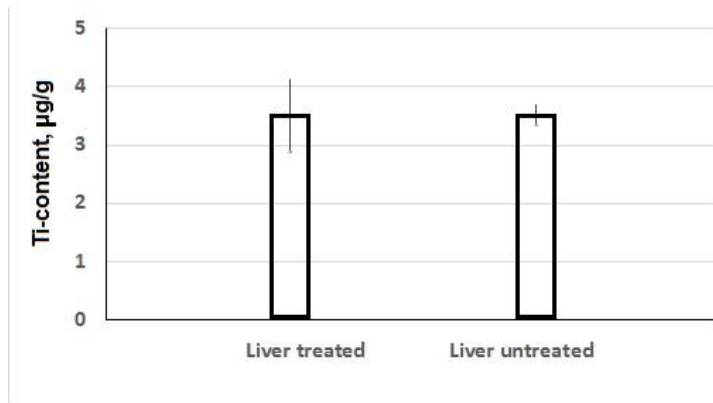

**Figure FS5.** Concentrations of TiO<sub>2</sub> in the liver of the rats treated and untreated (control) by nano dispersion measured on the day 28 from the start in a repeated experiment

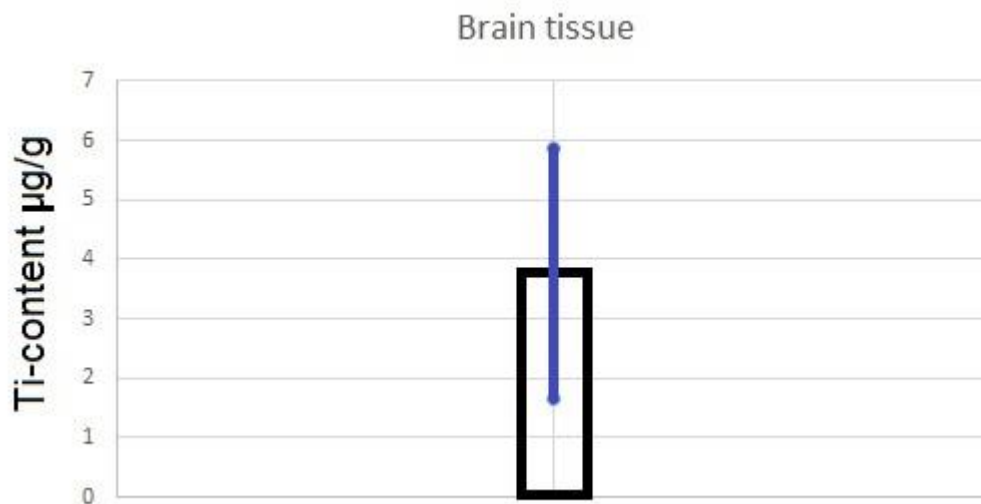

**Figure FS6.** Concentrations of TiO<sub>2</sub> in the brain tissue of the rats treated with titania. The observed value of  $3.77 \pm 2.11$  µg/g is well corresponding to that generally observed in rats in this kind of tissue (see, for example, I.Grissa et al. *Environ Sci Pollut Res*, **2016**, 23, 20205-20213; X.Y. Gao, *Biol Trace Elem Res*, **2011**, 143, 1616-1628; H.B. Shi et al. *Particle & Fibre Toxicol*, **2013**, 10, 15 (1-33). doi: 10.1186/1743-8977-10-15).
